# Supplementary material for: When Does Choice of Accuracy Measure Alter Imputation Accuracy Assessments?
Source: PubMed Central journal article supplement (PMC4601794; doi:10.1371/journal.pone.0137601), 2015-10-12
Supplement: pone.0137601.s012.pdf [file pone.0137601.s012.pdf]

**S1 Table.** Sub-populations in the BEAGLE AFR and EUR reference panels.

| AFR: 246 individuals                      | EUR: 379 individuals                                                       |
|-------------------------------------------|----------------------------------------------------------------------------|
| 61 African Ancestry in Southwest US (ASW) | 85 Utah residents (CEPH) with Northern and Western European ancestry (CEU) |
| 97 Luhya in Webuye, Kenya (LWK)           | 89 British from England and Scotland (GBR)                                 |
| 88 Yoruba in Ibadan, Nigeria (YRI)        | 98 Toscani in Italia (TSI)                                                 |
|                                           | 93 Finnish from Finland (FIN)                                              |
|                                           | 14 Iberian populations in Spain (IBS)                                      |
