# Supplementary material for: When Does Choice of Accuracy Measure Alter Imputation Accuracy Assessments?
Source: PubMed Central journal article supplement (PMC4601794; doi:10.1371/journal.pone.0137601), 2015-10-12
Supplement: pone.0137601.s013.pdf [file pone.0137601.s013.pdf]

**S2 Table.** Numbers of SNPs in the study samples. Study sample variants were those found on each commercially available SNP array for the 2 MB chromosomal regions of interest. Only variants with dbSNP identifiers are listed in the number of variants in the reference panel column.

| Number of Genotyped SNPs in Each Region |           |          |        |      |      |
|-----------------------------------------|-----------|----------|--------|------|------|
| Chromosome                              | Omni 2.5M | Affy 500 | Affy 6 | Duo  | Quad |
| 8                                       | 1669      | 255      | 531    | 960  | 611  |
| 15                                      | 2740      | 555      | 1105   | 1231 | 1970 |
