# Supplementary material for: When Does Choice of Accuracy Measure Alter Imputation Accuracy Assessments?
Source: PubMed Central journal article supplement (PMC4601794; doi:10.1371/journal.pone.0137601), 2015-10-12
Supplement: pone.0137601.s014.pdf [file pone.0137601.s014.pdf]

S3 Table. Polymorphic, imputed SNPs used in the comparison of accuracy measures.

These variants were found in the 2 MB chromosomal regions of interest and were imputed using Omni 2.5 coverage.

|        | AFR    | EUR   |
|--------|--------|-------|
| Chr 8  | 10,149 | 6,753 |
| Chr 15 | 12,290 | 8,464 |
